# Supplementary material
Source: PubMed Central journal article supplement (PMC3365720)
Supplement: supp_M111.284521_jbc.M111.284521-1.pdf [file supp_M111.284521_jbc.M111.284521-1.pdf]

**Table S1.** Dystrophin antibodies.

| name       | clone | immunogen (human dystrophin)                   | epitope |                      |                 | vendor (catalogue number) | references for characterization of antibodies |
|------------|-------|------------------------------------------------|---------|----------------------|-----------------|---------------------------|-----------------------------------------------|
|            |       |                                                | exons   | region               | amino acids     |                           |                                               |
| MANEX1A    | 4C7   | recombinant aa1-68                             |         | amino terminus       | includes aa 2-4 | DSHB                      | 6, 11                                         |
| MANEX7B    | 8E11  | recombinant fragment encoded by exons 4-16     | 7-8     | actin binding domain |                 | DSHB                      | 2                                             |
| MANHINGE1B | 10F9  | peptide aa255-279 conjugated to albumin        | 8       | hinge 1              | 255-270         | DSHB                      | 1                                             |
| DYSB       | 34C5  | recombinant aa321-494                          | 10-12   | R1-2                 | 321-494         | Leica (NCL-DYSB)          |                                               |
| MANDYS19   | 8F6   | recombinant aa816-1749                         | 20-21   | R5                   | 856-915         | DSHB                      | 8, 9                                          |
| MANDYS16   | 1B12  | recombinant aa816-1749                         | 27      | R8                   | 1226-1245       | DSHB                      | 8, 9                                          |
| MANDYS1    | 3B7   | recombinant dystrophin fragment                | 31-32   | R10-11               | 1431-1505       | DSHB                      | 8, 9                                          |
| MANDYS110  | 3H10  | recombinant aa1749-2248 as TrpE fusion protein | 38-39   | R14                  | 1774-1856       | DSHB                      | 9, 10                                         |
| MANDYS102  | 7D2   | recombinant aa1749-2248 as TrpE fusion protein | 43      | R16                  | 2047-2105       | DSHB                      | 9, 10                                         |

|                   |      |                                             |    |                  |           |                              |                |
|-------------------|------|---------------------------------------------|----|------------------|-----------|------------------------------|----------------|
| MANEX45A          | 8F10 | recombinant fragment encoded by exons 45-46 | 45 | R17              |           | DSHB                         | 11             |
| MANEX46B          | 7G1  | recombinant fragment encoded by exons 45-46 | 46 | R18              |           | DSHB                         | 11             |
| MANEX50           | 6A9  | recombinant fragment encoded by exons 45-50 | 50 | hinge 3          |           | DSHB                         | 11             |
| MANDRA1           | 7A10 | recombinant dystrophin fragment             |    | carboxy terminus | 3667-3671 | DSHB                         | 3, 4, 5, 7, 10 |
| rabbit polyclonal |      | synthetic peptide, aa3661-3677              |    | carboxy terminus | 3661-3677 | abcam <sup>®</sup> (ab15277) |                |

abcam<sup>®</sup> = <http://www.abcam.com/>

DSHB = Developmental Studies Hybridoma Bank, The University of Iowa (<http://dshb.biology.uiowa.edu/>)

Leica = Leica Microsystems (<http://www.leica-microsystems.com/products/total-histology/novocastra-reagents/>)

## References

1. Ahmed N, Nguyen TM, Morris GE (1998) Flexible hinges in dystrophin. *Biochem Soc Trans* 26:S310
2. Bartlett RJ, Stockinger S, Denis MM, Bartlett WT, Inverardi L, Le TT, Nguyen TM, Morris GE, Bogan DJ, Metcalf-Bogan J, Kornegay JN (2000) In vivo targeted repair of a point mutation in the canine dystrophin gene by a chimeric RNA/DNA oligonucleotide. *Nat Biotechnol* 18:615-622
3. D'Souza VN, Nguyen TM, Morris GE, Karges W, Pillers DM, Ray PN (1995) A novel dystrophin isoform is required for normal retinal electrophysiology. *Hum. Mol. Genet.* 4:837-842
4. Ellis JM, Nguyen TM, Morris GE, Ginjaar IB, Moorman AFM, van Ommen G-JB (1990) Specificity of dystrophin analysis improved with monoclonal antibodies. *The Lancet* 336:881-882
5. Lederfein D, Levy Z, Augier N, Leger J, Morris GE, Fuchs O, Yaffe D, Nudel U (1992) 71kD protein is a major product of the Duchenne Muscular Dystrophy gene in brain and other non-muscle tissues. *Proc. Natl. Acad. Sci. USA* 89:5346-5350

6. Morris GE, Nguyen C, Nguyen TM (1995) Specificity and VH sequence of two monoclonal antibodies against the N-terminus of dystrophin. *Biochem J* 309:355-359
7. Morris GE, Sedgwick SG, Ellis JM, Pereboev A, Chamberlain JS, Nguyen TM (1998) An epitope structure for the C-terminal domain of dystrophin and utrophin. *Biochem.* 37:11117-11127
8. Nguyen TM, Cartwright AJ, Morris GE, Love D, Bloomfield JF, Davies KE (1990) Monoclonal antibodies against defined regions of the muscular dystrophy protein, dystrophin. *FEBS Lett.* 262:237-240
9. Nguyen TM and Morris GE (1993) Use of epitope libraries to identify exon-specific monoclonal antibodies for characterization of altered dystrophins in muscular dystrophy. *Am J Hum Genet* 52:1057-1066
10. Nguyen TM, Ginjaar IB, van Ommen G-JB, Morris GE (1992) Monoclonal antibodies for dystrophin analysis: epitope mapping and improved binding to SDS-treated muscle sections. *Biochem J* 288:663-668
11. Thanh LT, Nguyen TM, Hori S, Sewry CA, Dubowitz V, Morris GE (1995) Characterization of genetic deletions in Becker muscular dystrophy using monoclonal antibodies against a deletion-prone region of dystrophin. *Am J Med Genet* 58:177-186

## **Legends to supplementary figures.**

Figure S1. Complete primary sequence of the region of dystrophin coded by exons 6 to 14. Domains of the protein are marked at the beginning of the lines. Exons were coloured sequentially to highlight their boundaries and phase with the protein domains. The number of the residue beginning an exon is noted under the sequence. The sequence recognized by the antibody MANHINGE1B is underlined in exon 8.

Figure S2. Superposition of the  $^1\text{H}$  NMR spectra of R12 WT and R12 L427P. The spectra were acquired at 500 MHz on a Bruker Avance with water presaturation. Several resonances at high field and the dispersion of the amide protons are indicative of a folded wild type protein. In contrast, the spectrum of the mutated protein rather corresponds to an only partly folded protein as indicated by the broad NH resonances and the absence of high field signals.

Figure S3. (A) The three first principal components (PC) of motion measured from the R1-2 WT MD trajectory. Motion arrays are centred on  $\text{C}\alpha$  atoms, sized and coloured depending on their amplitude from blue (low) to red (high). (B) Overlap of covariance matrices of the ten first principal modes is presented at bottom right. Second principal mode seems to remain unaffected by the L427P mutation. The first and the third most contributing components to the global motion (sum over 35% of the total) are the most strongly modified by the single mutation. Only 34% similarity has been measured between WT and mutant for PC1 and PC3.

/6 6/7  
 <CH2>lqqtNSEKILLSWVRQSTRNYPQVNVINFTTSWSDGLALNALIHSHRPDLFDWNSVVCQGSAT  
 131 178

7/8  
 QRLEHAFNIARYQLGIE KLDPEDVDTTYPDKKSILMYITSLFQVLPQQVSIE  
 217

8/9  
 <HINGE1>AIQEVEMLPRPPKVTKEEHFQLHHQMHSQQITVSLAGGYERTSSPKPRFKSYAYTQAAY  
 MANHINGE1B 278

9/10  
 VTTSDPTRSPFPSQHLEAPEDKSFSSLMES  
 321

10/11  
 <R1>EVNLDRYQTALEEVLSWLLSAEDTLQAGGEISNDVEVVKDQFHTHEGYMMDLTAHQGRVGNILQ  
 384

\* 11/12  
 LGSKLIGTGKLSDEETEVEQEQMNLNSRWECLRVASMEKQSNLH  
 445

12/13  
 <R2>RVLMDLQNGKLKELNDWLTKTEERTRKMEEEPLGPDLEDLKRQVQGHKVLQEDLEGEQVRVNSL  
 495

13/14  
 THMVVVDESSGDHATAALEEQLKVLGDRWANICRWTEDRVLLQDI  
 535

**Fig. S1**

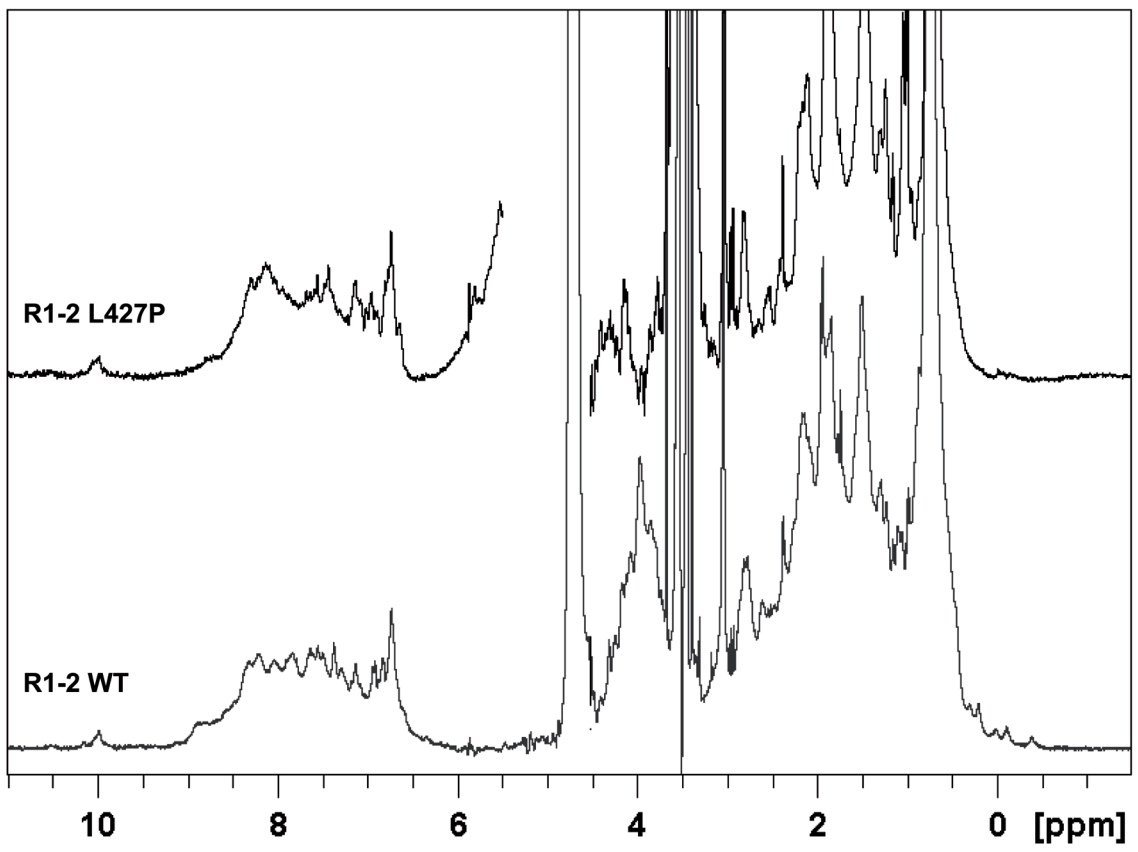

**Fig. S2**

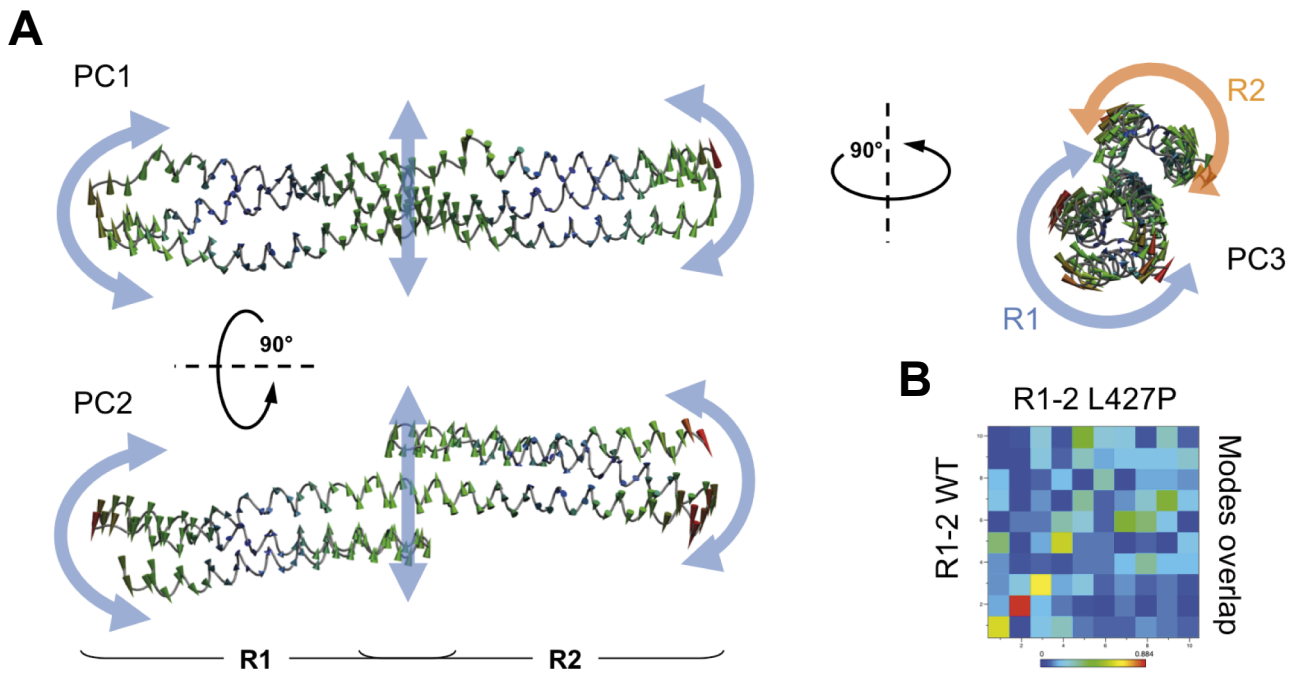

**Fig. S3**
